# Supplementary material
Source: PubMed Central journal article supplement (PMC10173145)

SUPPLEMENTAL FIGURE 1

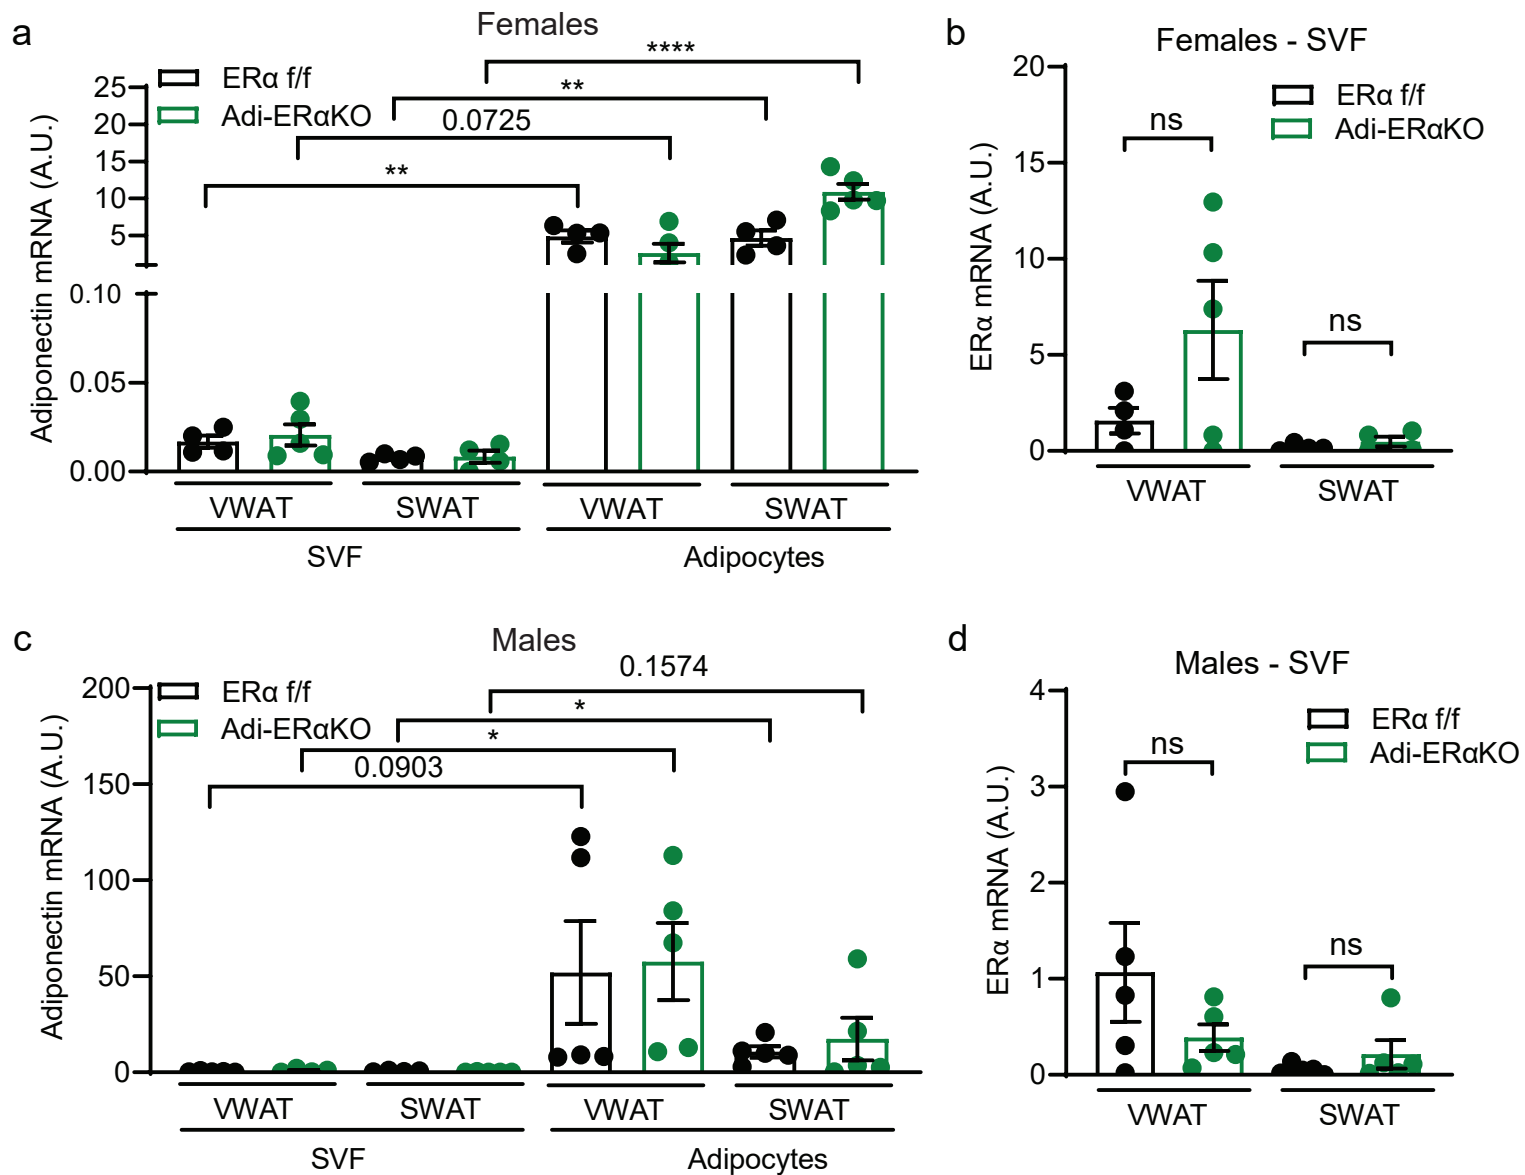

SUPPLEMENTAL FIGURE 2

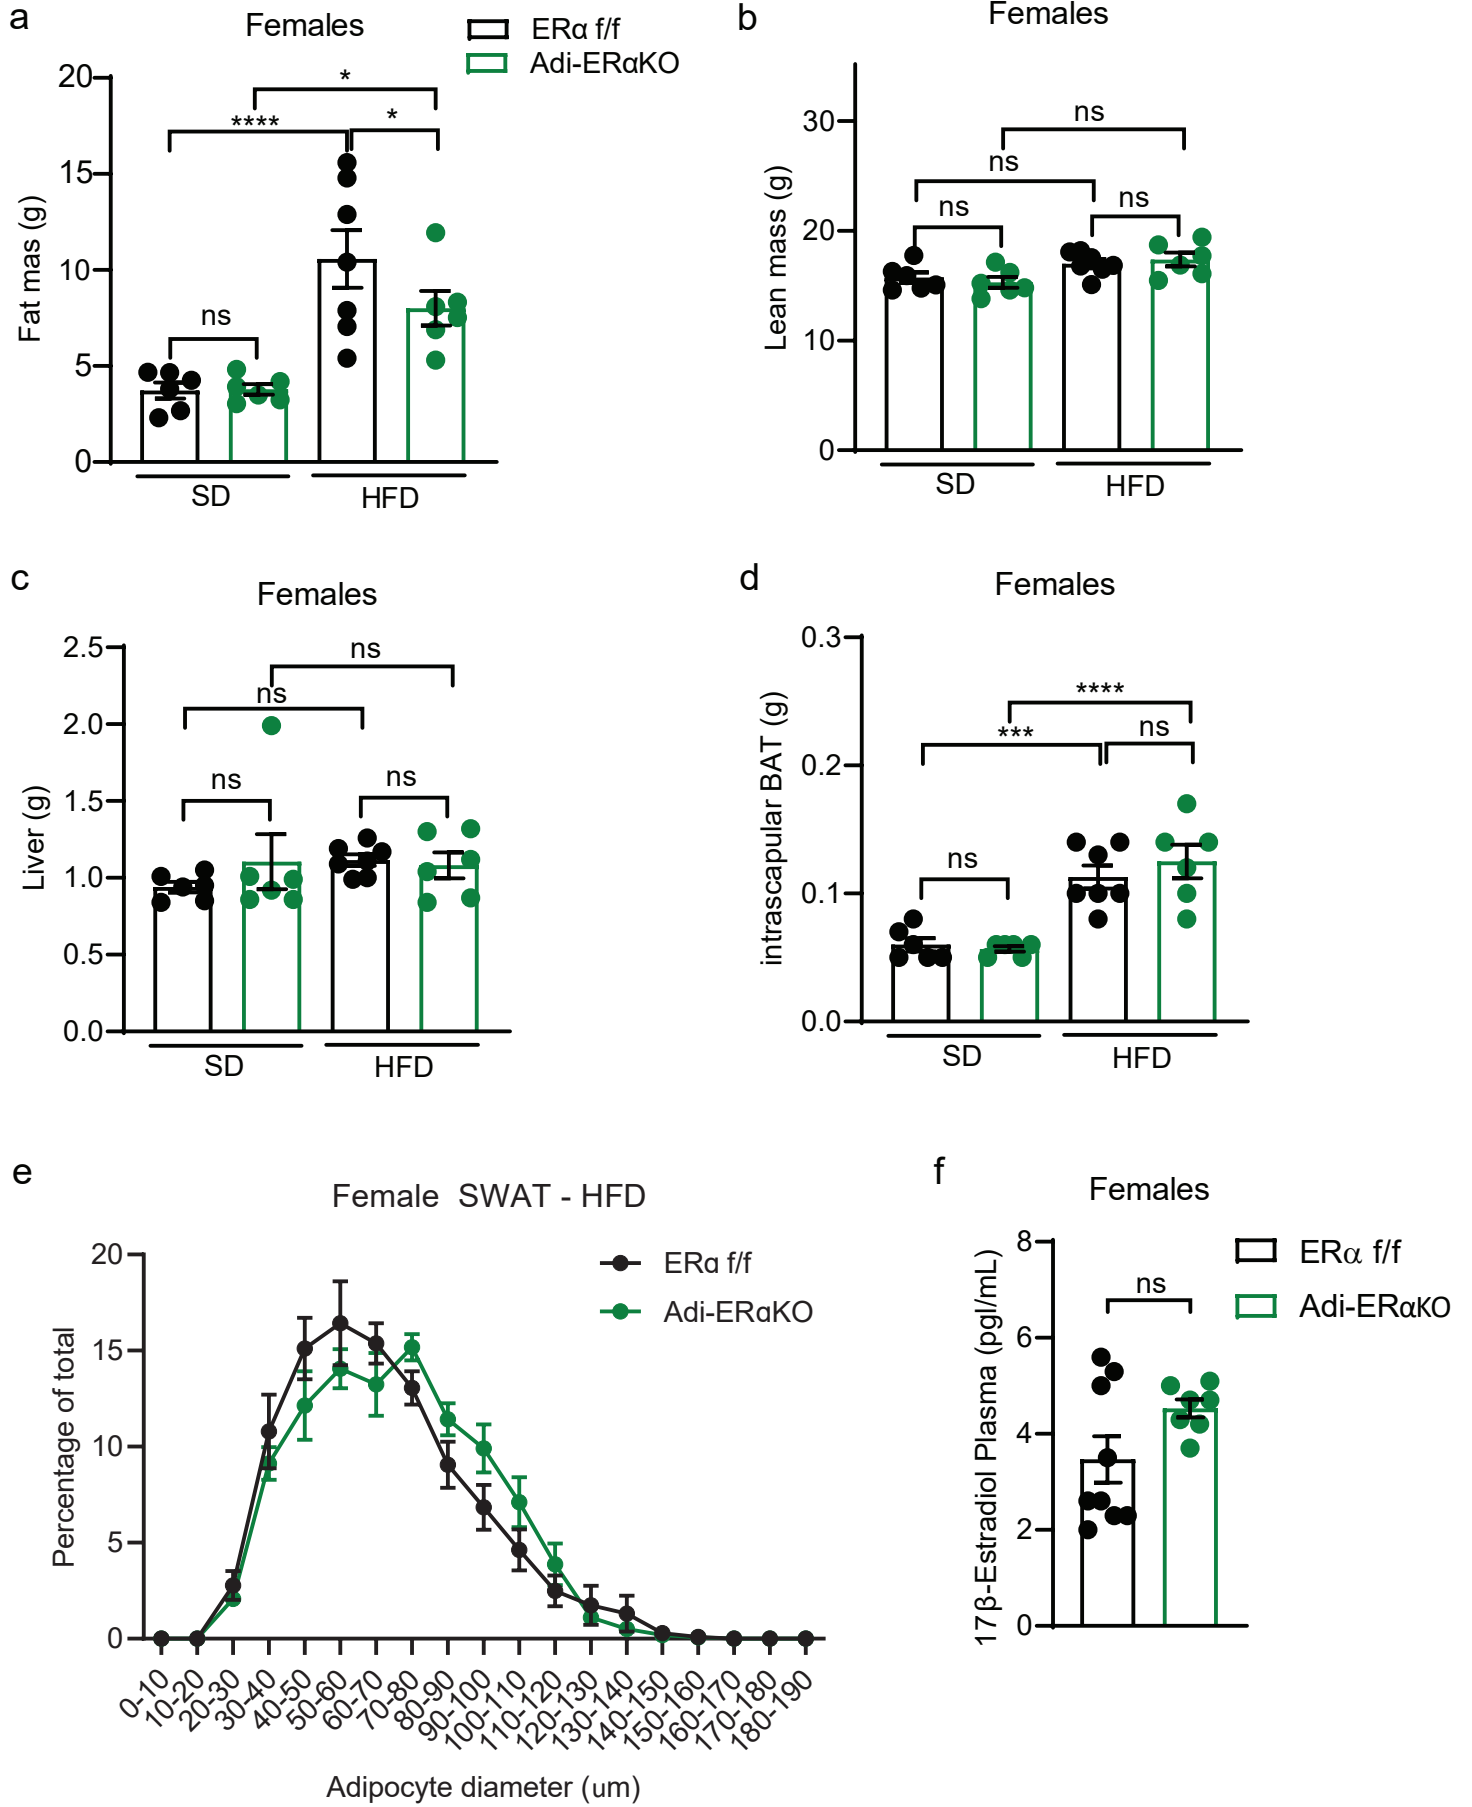

SUPPLEMENTAL FIGURE 3

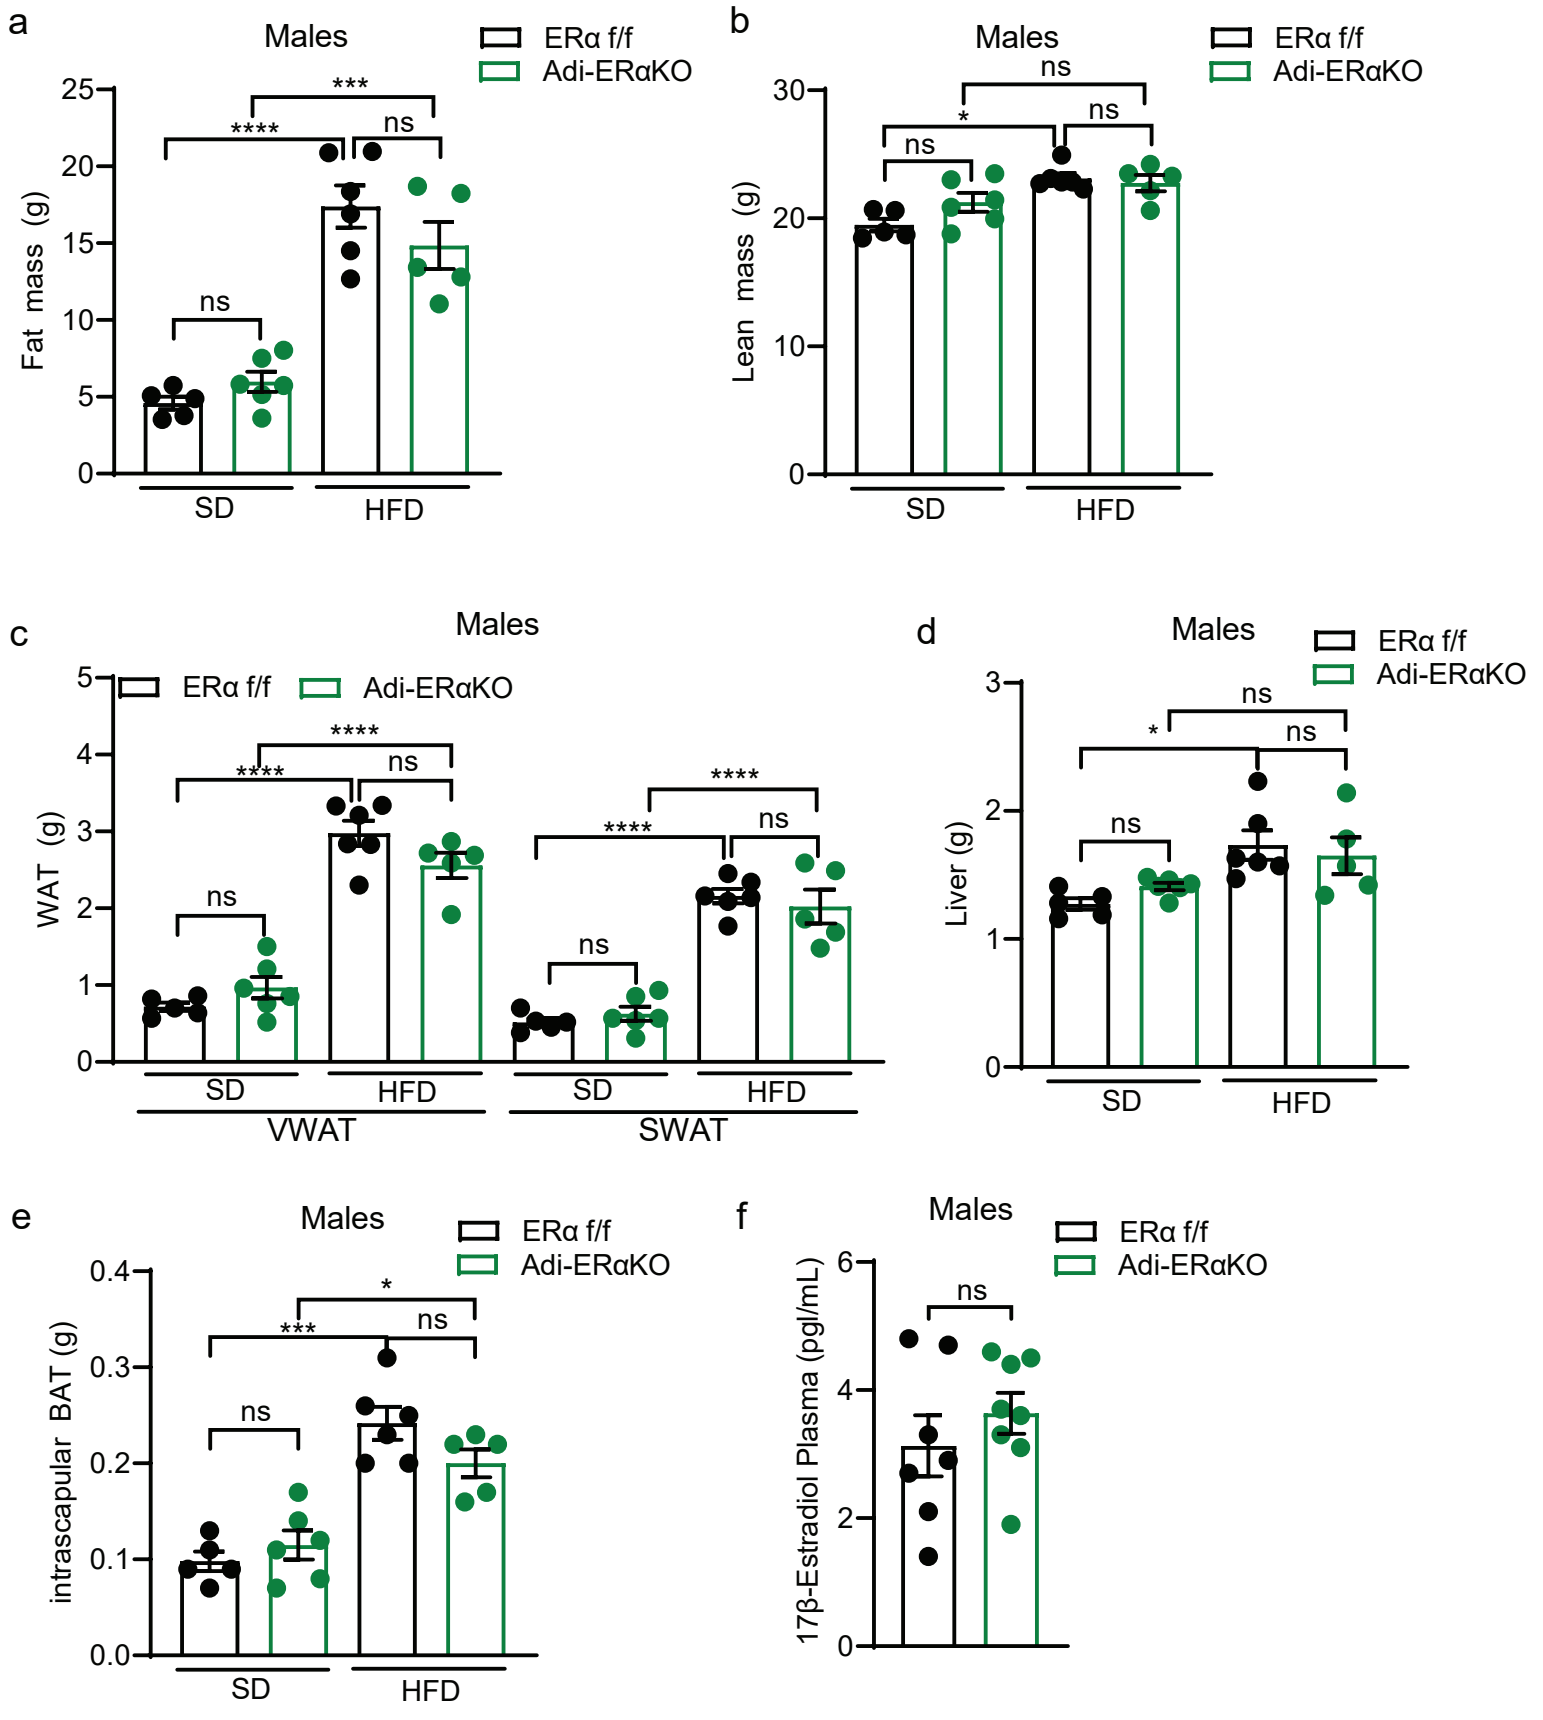

# SUPPLEMENTAL FIGURE 4

a

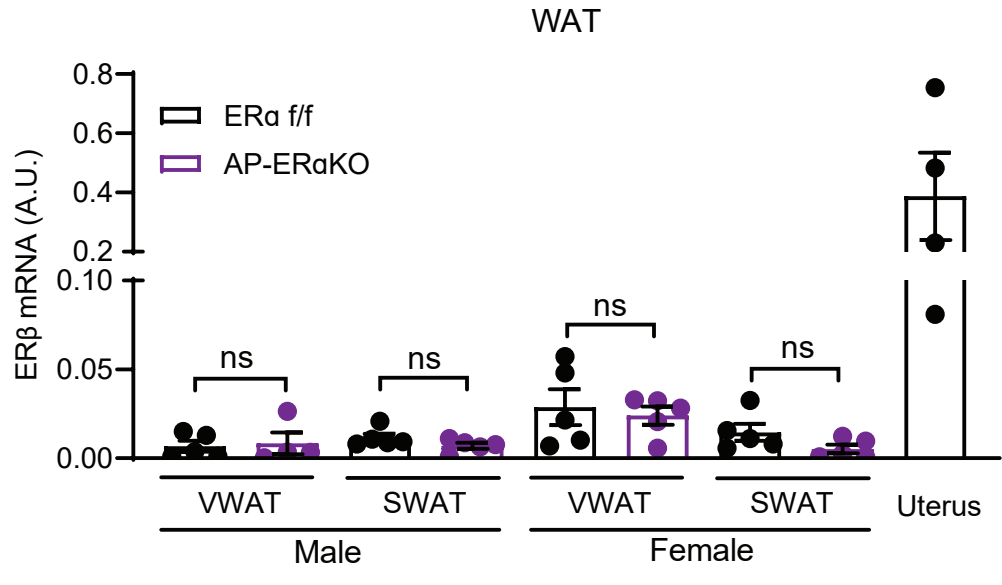

SUPPLEMENTAL FIGURE 5

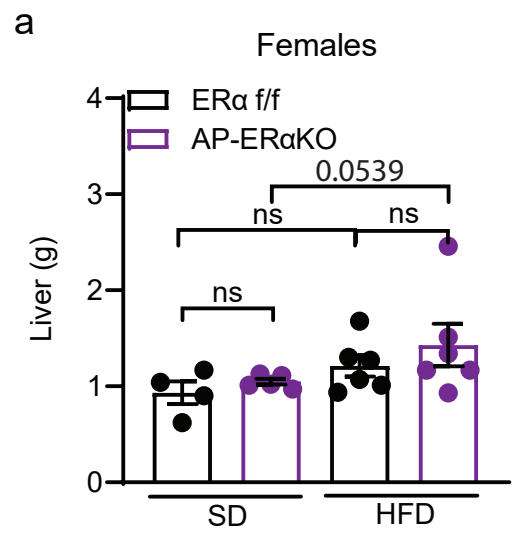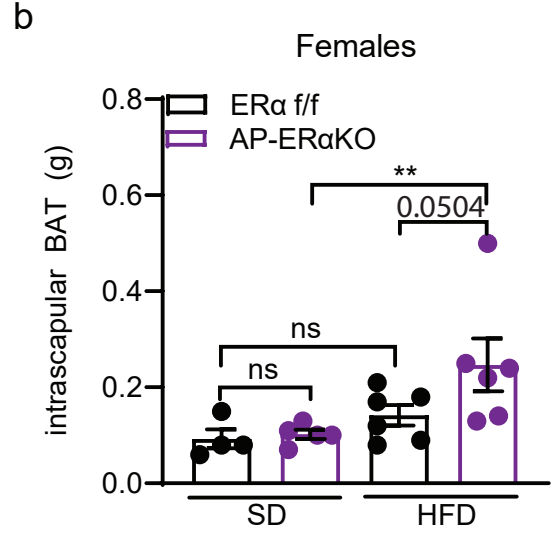

# SUPPLEMENTAL FIGURE 6

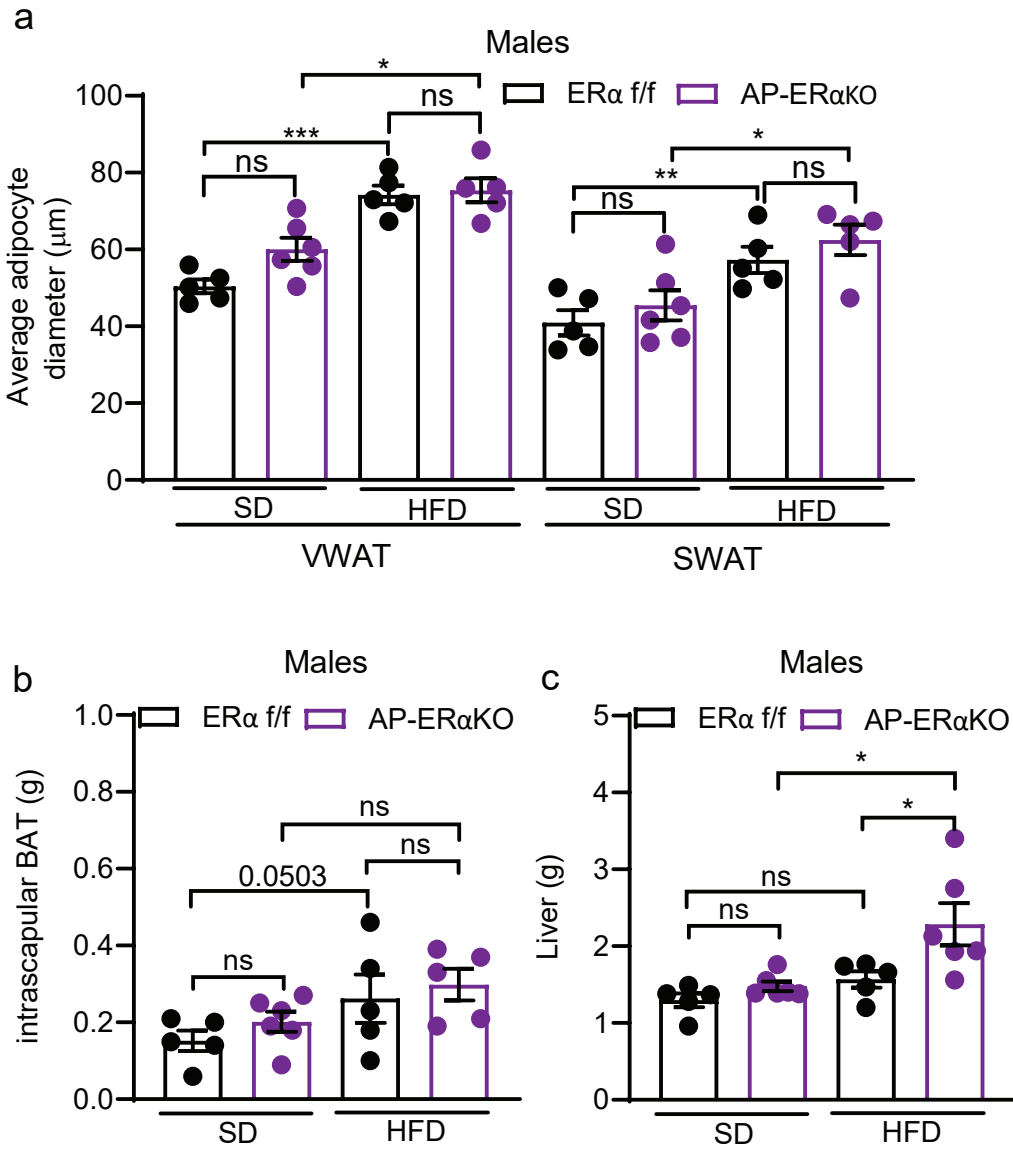

SUPPLEMENTAL FIGURE 7

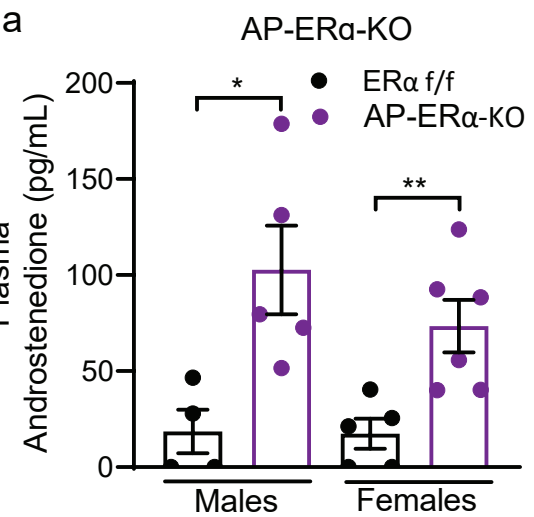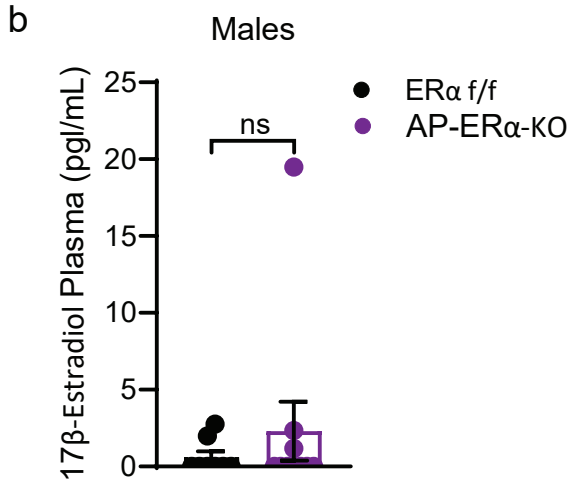

# SUPPLEMENTAL FIGURE 8

a

Females

Males

ER $\alpha$  f/f

AP-ER $\alpha$ KO

ER $\alpha$  f/f

AP-ER $\alpha$ KO

VWAT

SWAT

Muscle

Liver

iBAT

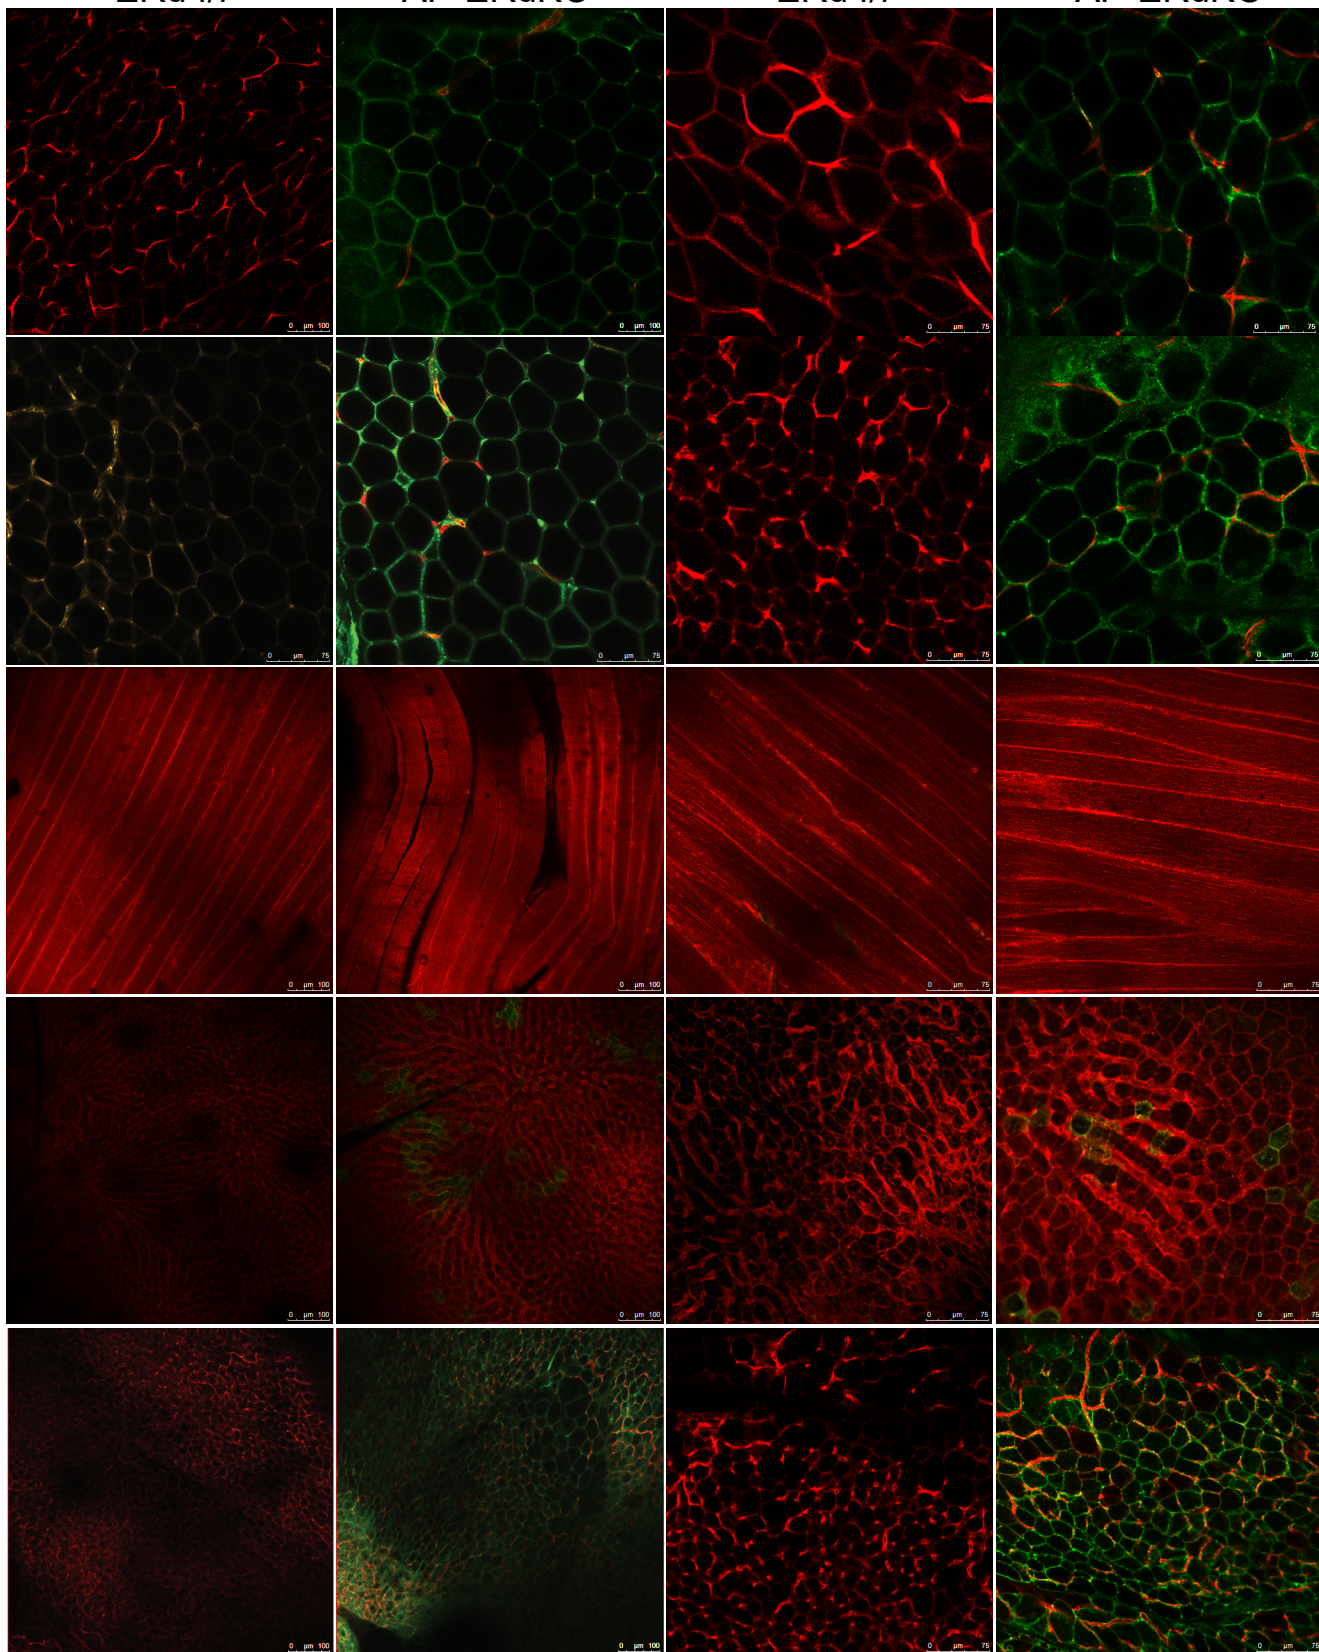

Supplement: NIHMS1887822-supplement-Supplementary_Figures.pdf [file NIHMS1887822-supplement-Supplementary_Figures.pdf]
